# Supplementary material for: Pd-catalyzed asymmetric allylic amination using easily accessible metallocenyl P,N-ligands
Source: Royal Society of Chemistry journal article supplement (doi:10.1039/c5ob00032g), 2015-01-01
Supplement: c5ob00032g1.pdf [file c5ob00032g1.pdf]

## Supporting information

### **Pd-Catalyzed Asymmetric Allylic Amination Using Easily Accessible Metallocenyl P,N-Ligands**

*Hongwei Wu,<sup>a</sup> Fang Xie<sup>a</sup> Yanlan Wang,<sup>a</sup> Xiaohu Zhao,<sup>a</sup> Delong Liu<sup>b,\*</sup> and Wanbin Zhang<sup>a,b,\*</sup>*

*<sup>a</sup> School of Chemistry and Chemical Engineering, Shanghai Jiao Tong University, 800 Dongchuan Road, Shanghai 200240, P. R. China*

*<sup>b</sup> School of Pharmacy, Shanghai Jiao Tong University, 800 Dongchuan Road, Shanghai 200240, P. R. China*

E-mail: wanbin@sjtu.edu.cn; dliu@sjtu.edu.cn

### **Contents**

|                      |     |
|----------------------|-----|
| 1. NMR Spectra.....  | S2  |
| 2. HPLC Spectra..... | S12 |

# 1. NMR spectra:

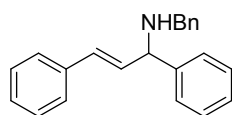

7a

## (E)-N-Benzyl-1,3-diphenylprop-2-en-1-amine(7a):

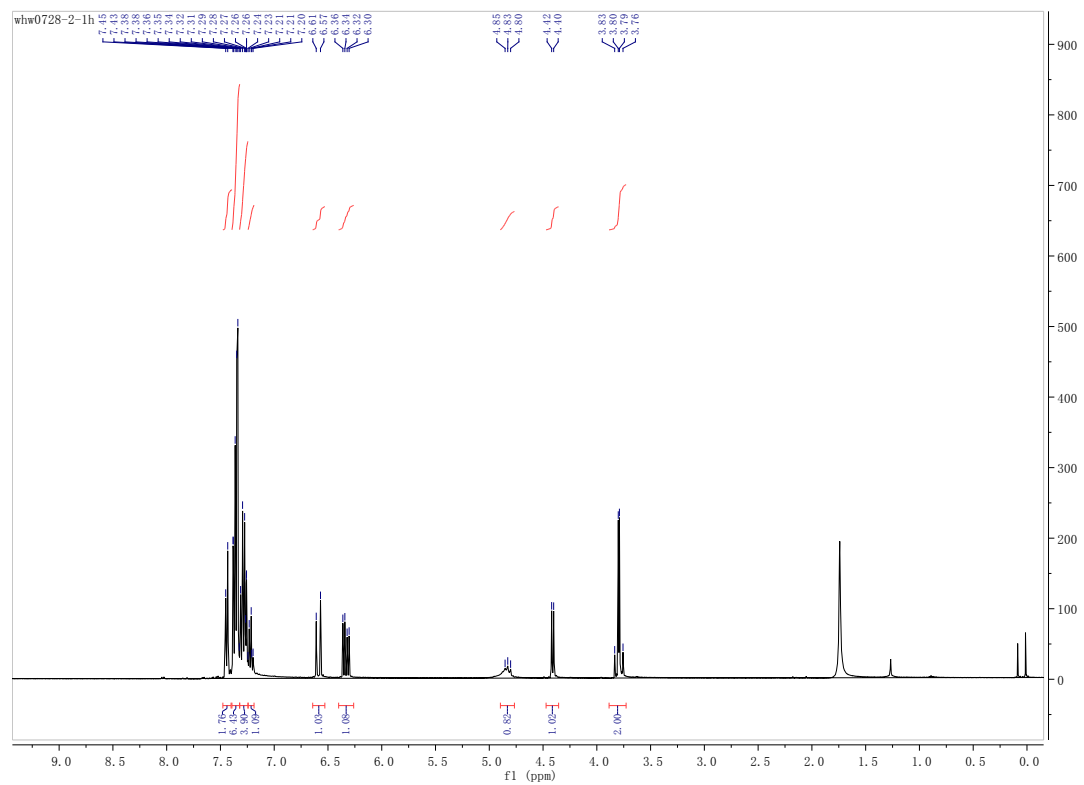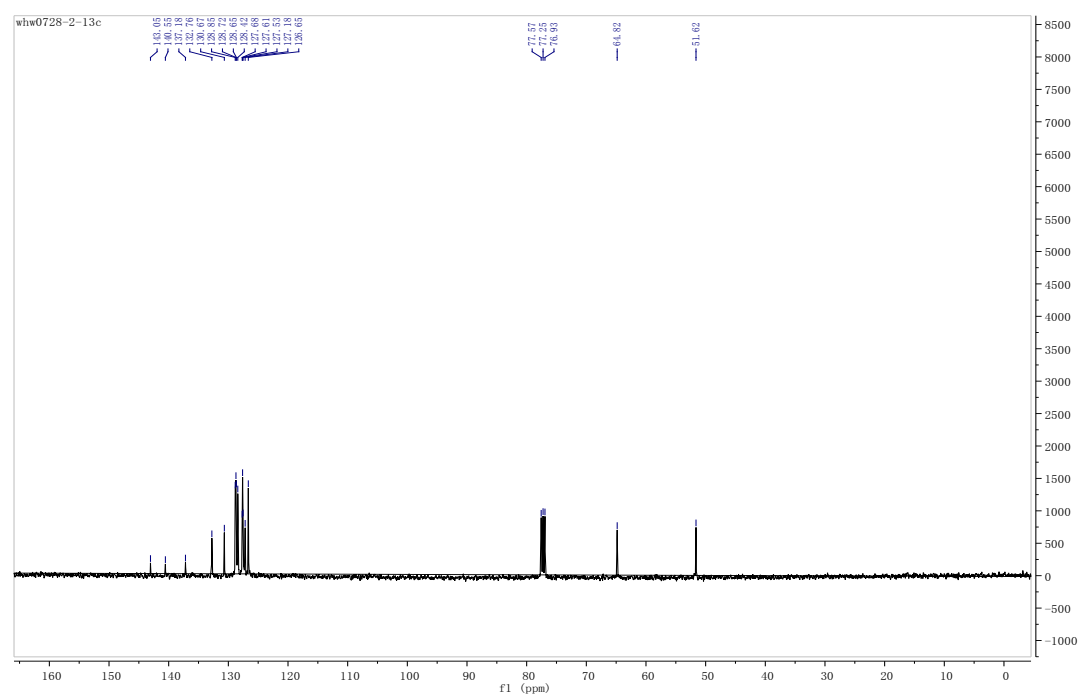

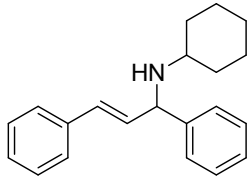

7b

(*E*)-N-(1,3-Diphenylallyl)cyclohexanamine(7b):

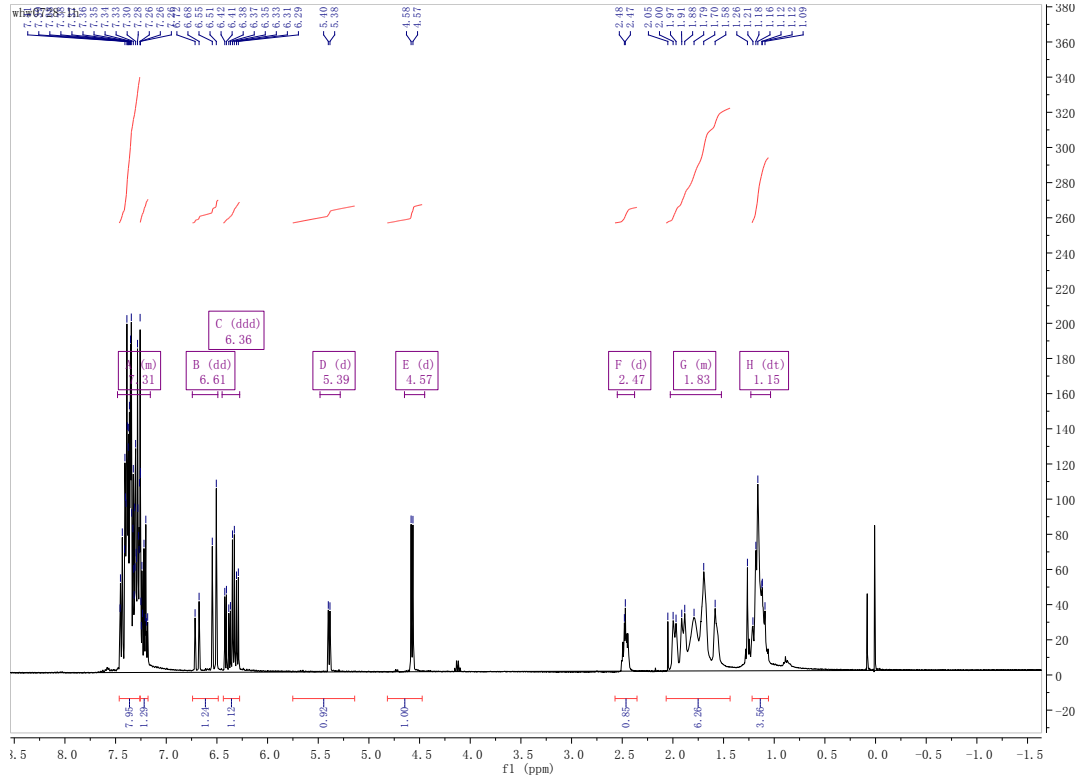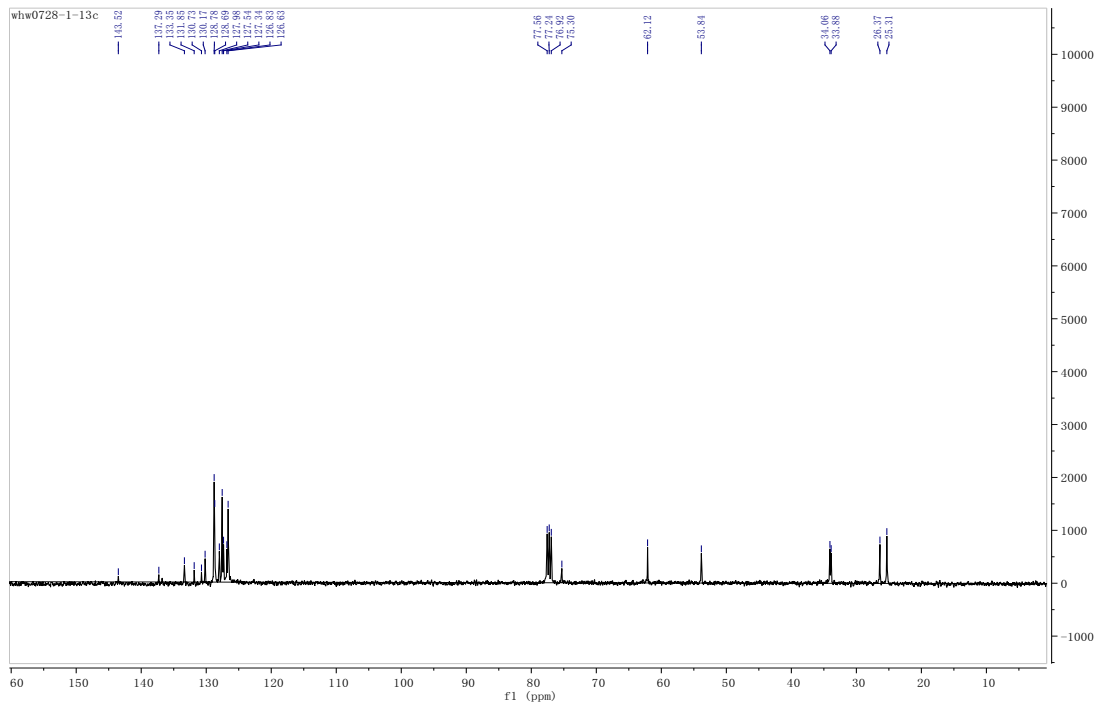



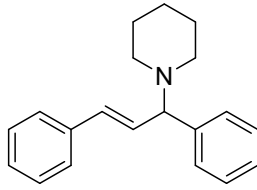

**7d**

**(E)-1-(1,3-Diphenylallyl)piperidine (7d):**

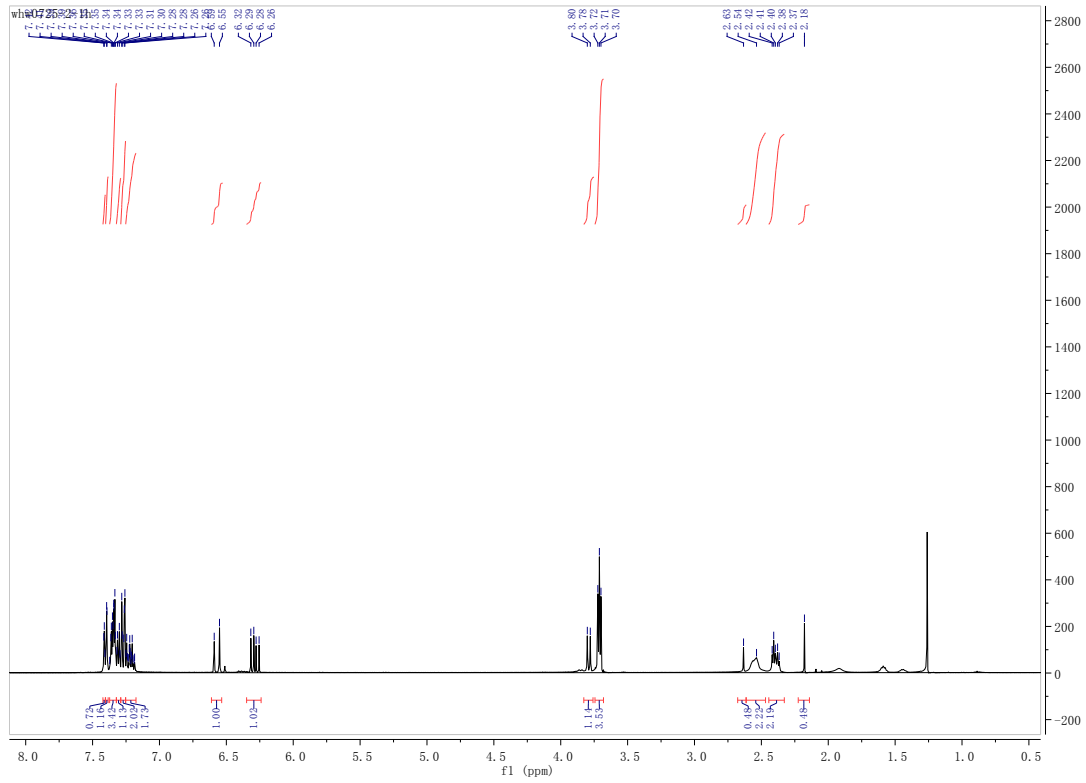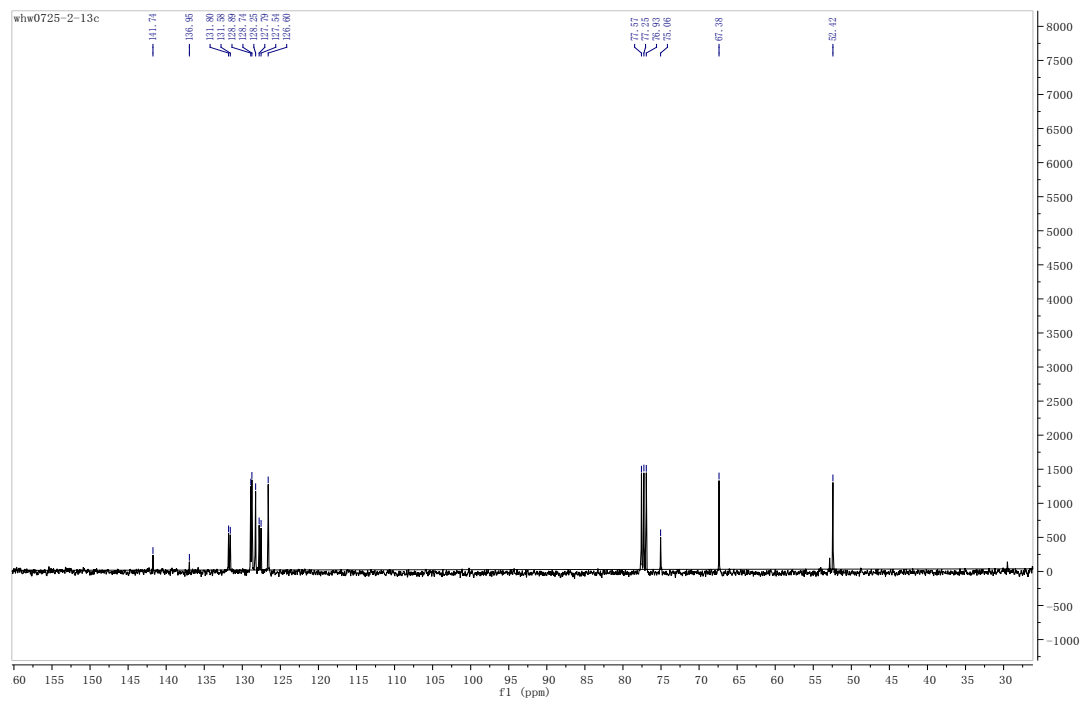



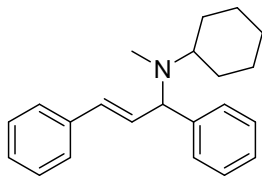

7f

(*E*)-N-(1,3-Diphenylallyl)-N-methylcyclohexanamine (7f):

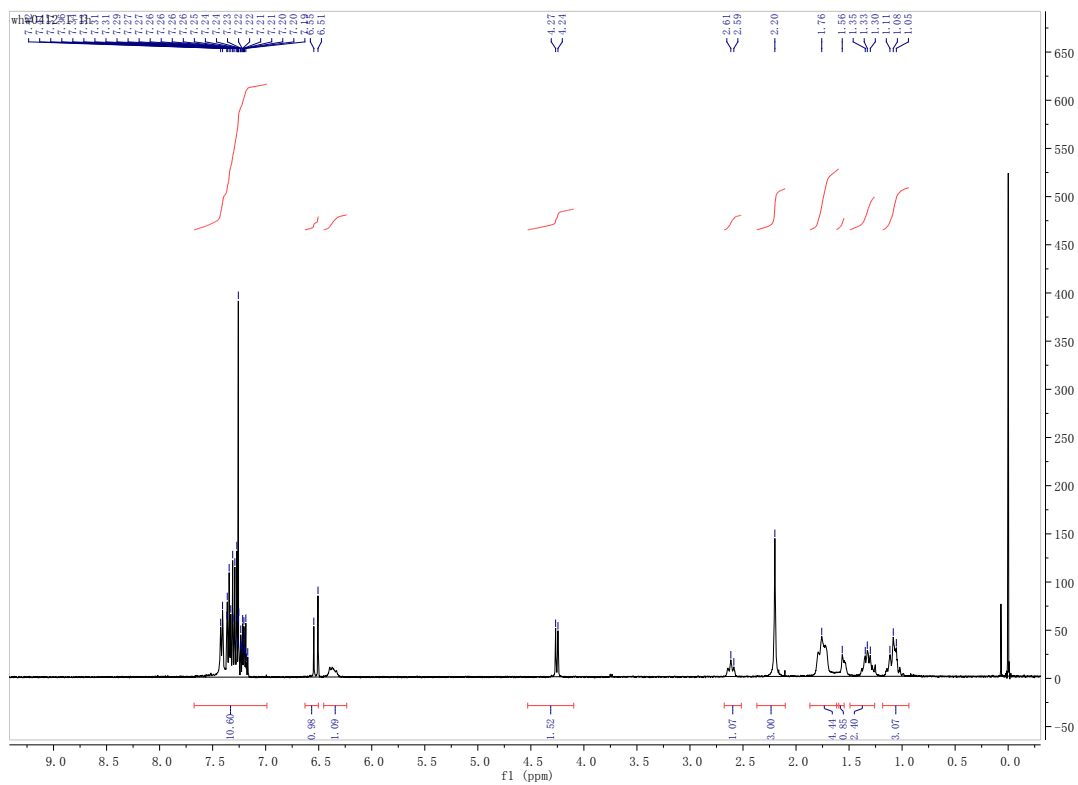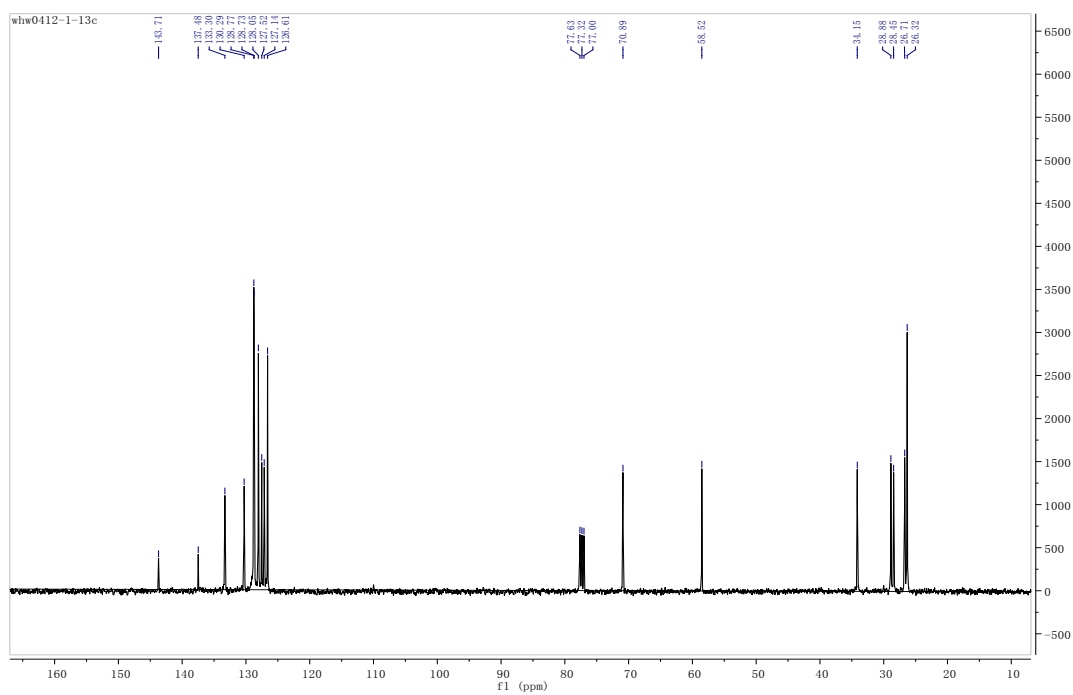

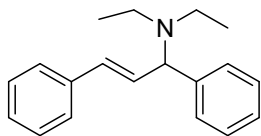

7g

(*E*)-*N,N*-Diethyl-1,3-diphenylprop-2-en-1-amine (7g):

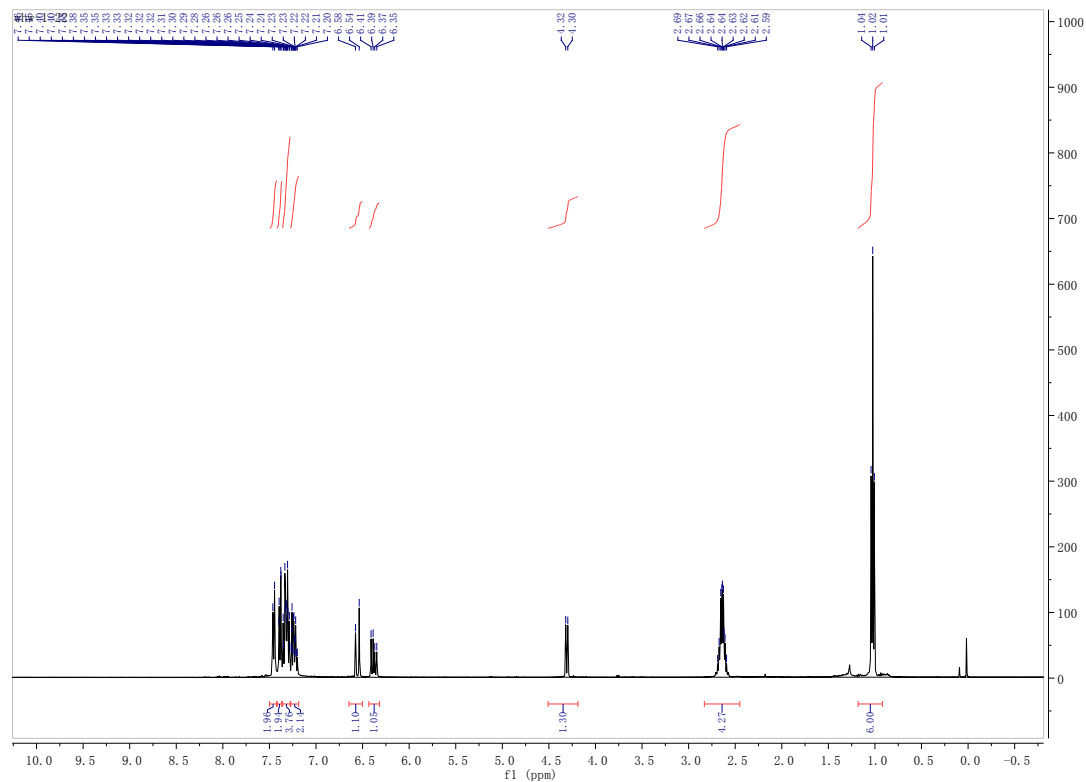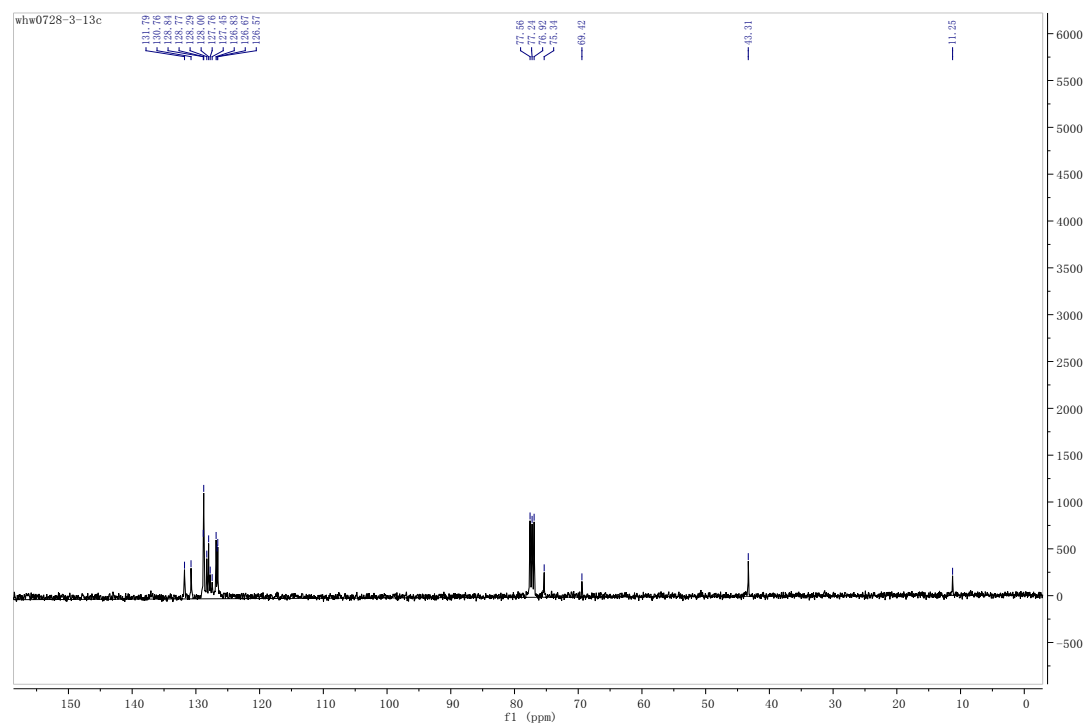



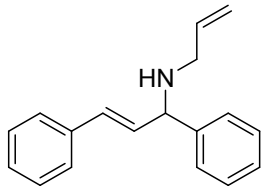

7h

(*E*)-N-Allyl-1,3-diphenylprop-2-en-1-amine (7h):

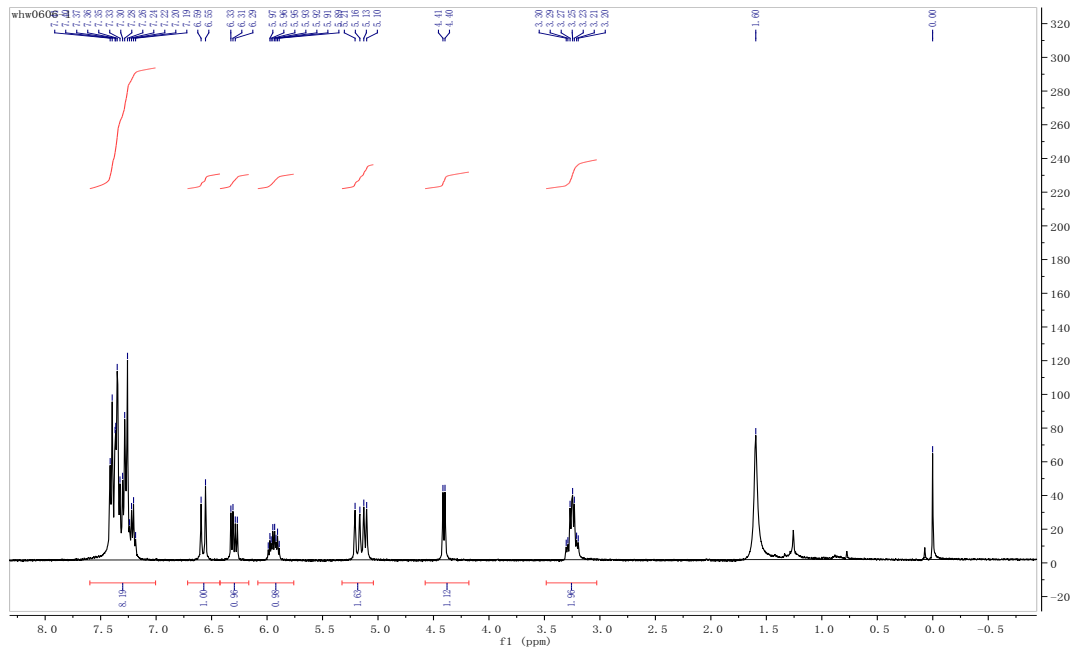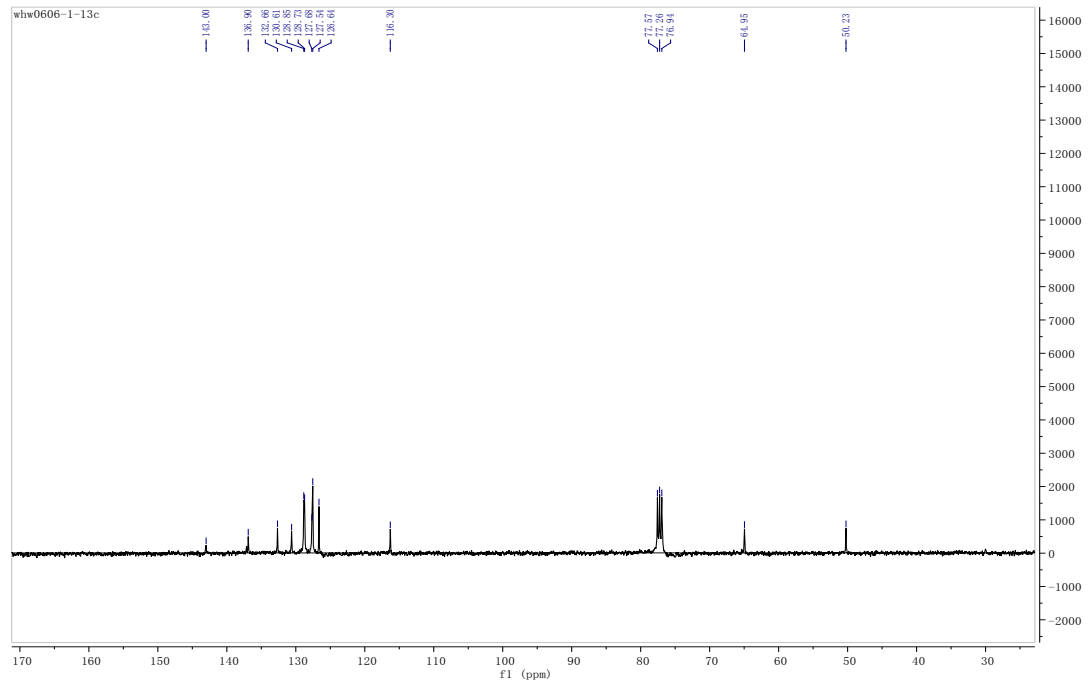

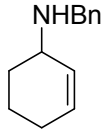

***N*-benzylcyclohex-2-enamine (7i):**

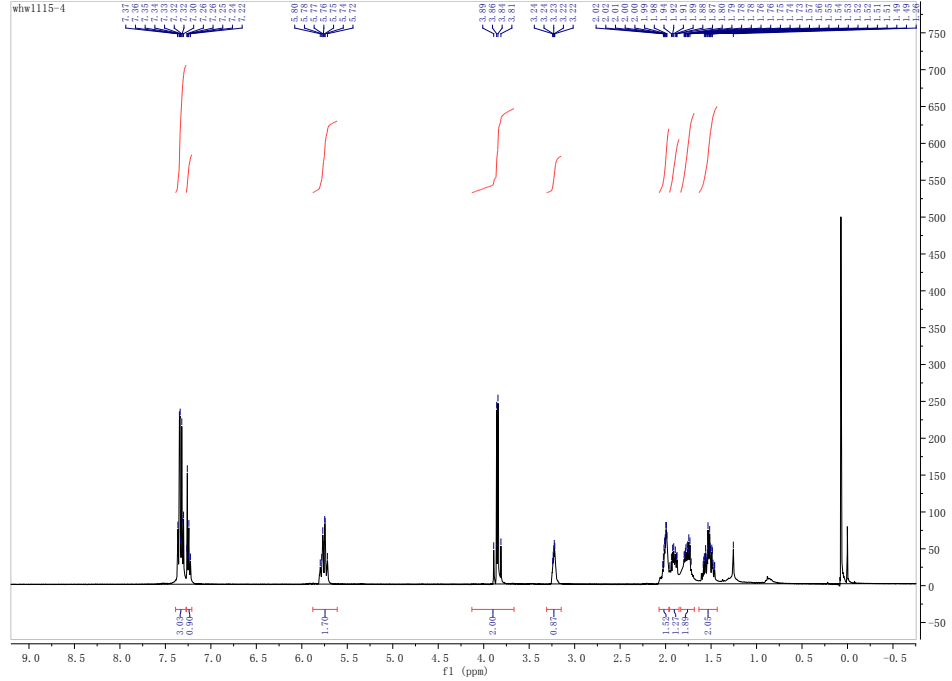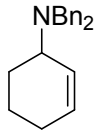

***N,N*-dibenzylcyclohex-2-enamine (7j):**

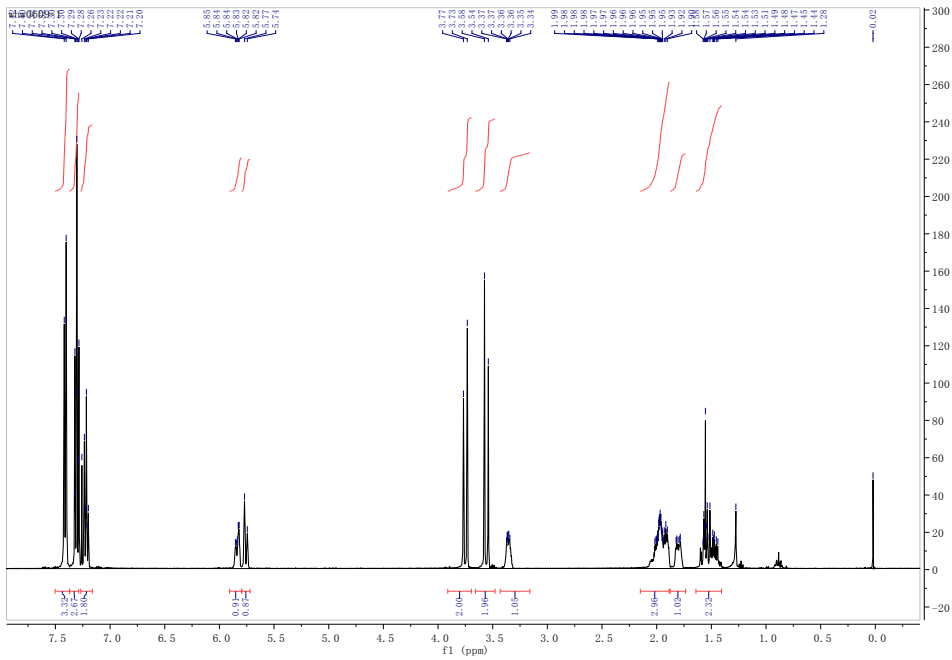

| <b>1b / Pd salt</b> | <b><math>^{31}\text{P}</math> NMR</b>                                                                                                                                                                                                                                                                                                                                                                                                              |
|---------------------|----------------------------------------------------------------------------------------------------------------------------------------------------------------------------------------------------------------------------------------------------------------------------------------------------------------------------------------------------------------------------------------------------------------------------------------------------|
| 1 / 2               | 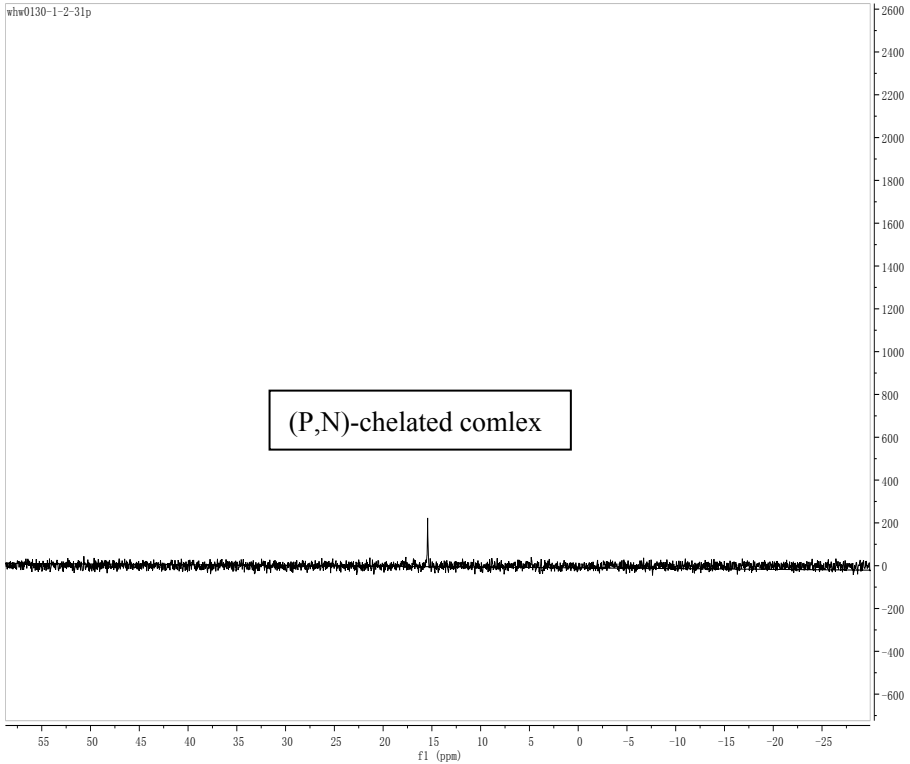 <p>whw0130-1-2-31p</p> <p>(P,N)-chelated complex</p> <p>The spectrum shows a single sharp peak at approximately 15 ppm. The x-axis is labeled 'f1 (ppm)' and ranges from 55 to -25. The y-axis ranges from -600 to 2600.</p>                                                                                                                                   |
| 1.5 / 2             |  <p>whw0130-1-1.5-31p</p> <p>(P,P)-chelated complex      (P,N)-chelated complex</p> <p>The spectrum shows two sharp peaks: one at approximately 55 ppm (labeled (P,P)-chelated complex) and one at approximately 15 ppm (labeled (P,N)-chelated complex). The x-axis is labeled 'f1 (ppm)' and ranges from 55 to -25. The y-axis ranges from -800 to 3200.</p> |

## 2. HPLC spectra:

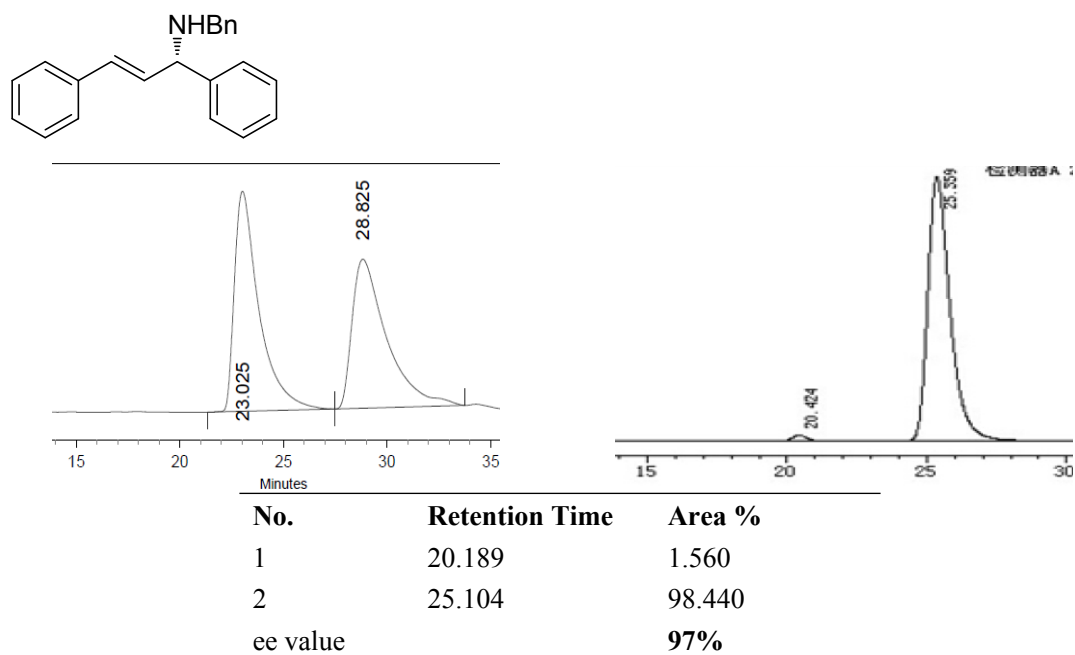

Figure 1. Enantioselective product of 1,3-diphenyl-2-propenyl acetate with benzylamine using **8b** as chiral ligand in Et<sub>2</sub>O at 25 °C (Table 5, entry 6).

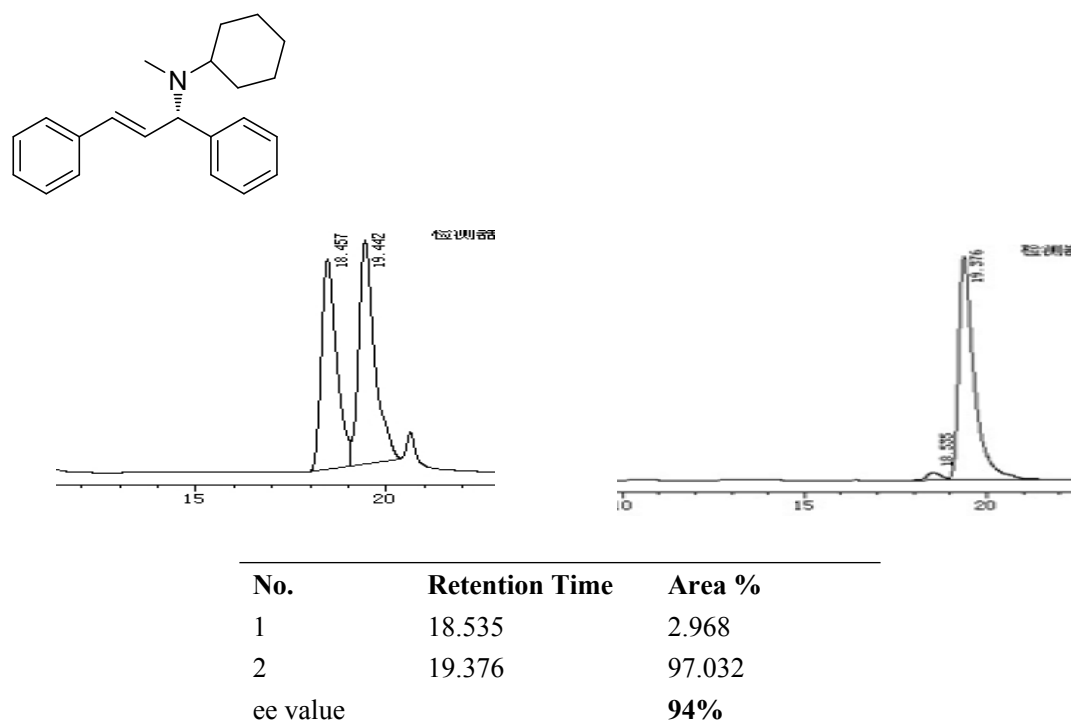

Figure 2. Enantioselective product of 1,3-diphenyl-2-propenyl acetate with N-methylcyclohexanamine using **8b** as chiral ligand in Et<sub>2</sub>O at 25 °C (Table 6, entry 6).

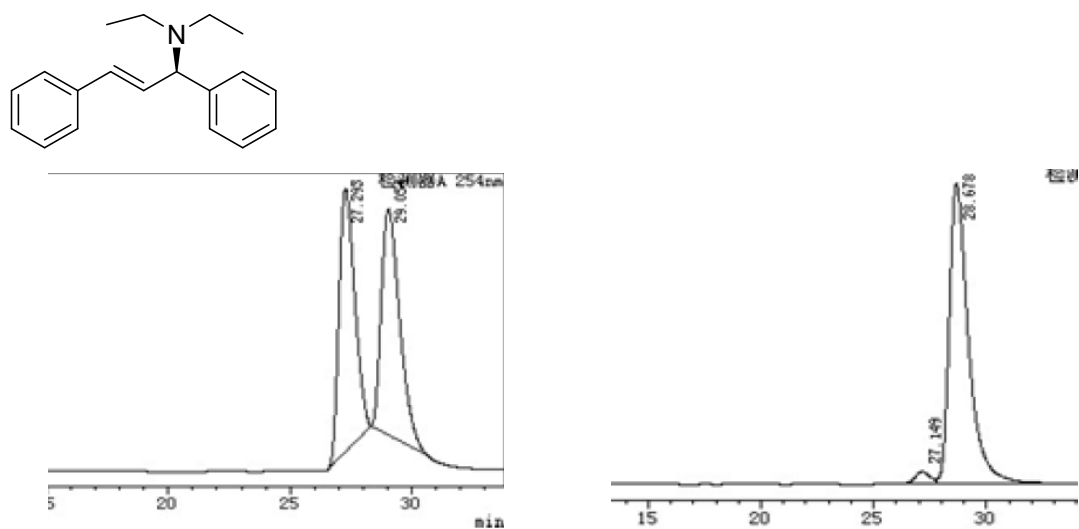

| No.      | Retention Time | Area %     |
|----------|----------------|------------|
| 1        | 27.149         | 2.857      |
| 2        | 28.678         | 97.143     |
| ee value |                | <b>94%</b> |

Figure 3. Enantioselective product of 1,3-diphenyl-2-propenyl acetate with diethylamine using **8b** as chiral ligand in Et<sub>2</sub>O at 25 °C (Table 6, entry 7).

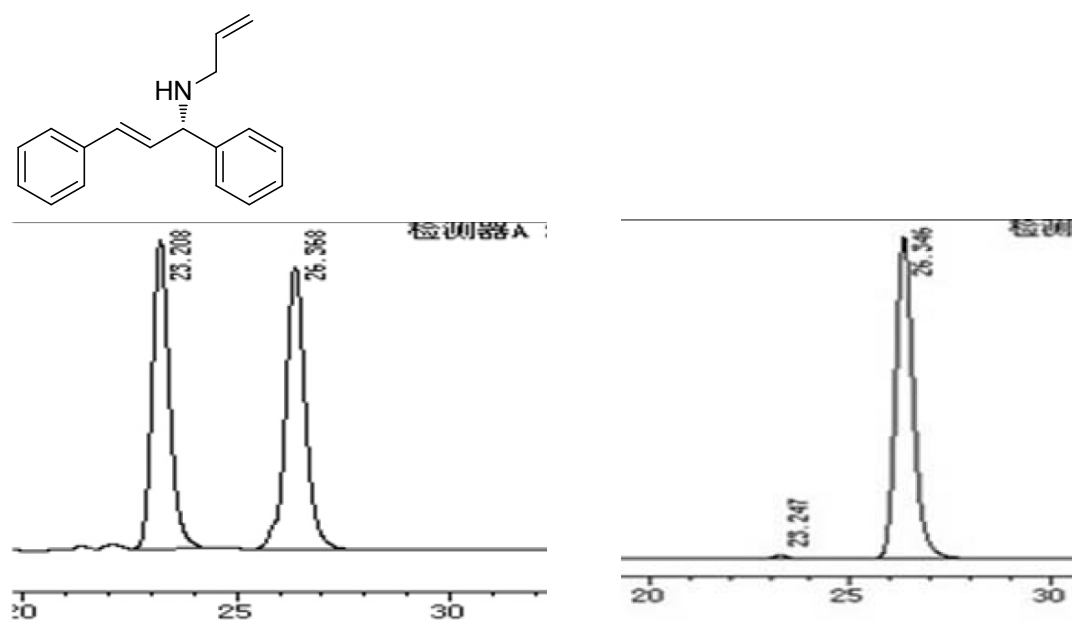

| No.      | Retention Time | Area %     |
|----------|----------------|------------|
| 1        | 23.247         | 0.941      |
| 2        | 26.346         | 99.059     |
| ee value |                | <b>98%</b> |

Figure 4. Enantioselective product of 1,3-diphenyl-2-propenyl acetate with prop-2-en-1-amine using **8b** as chiral ligand in Et<sub>2</sub>O at 25 °C (Table 6, entry 3).

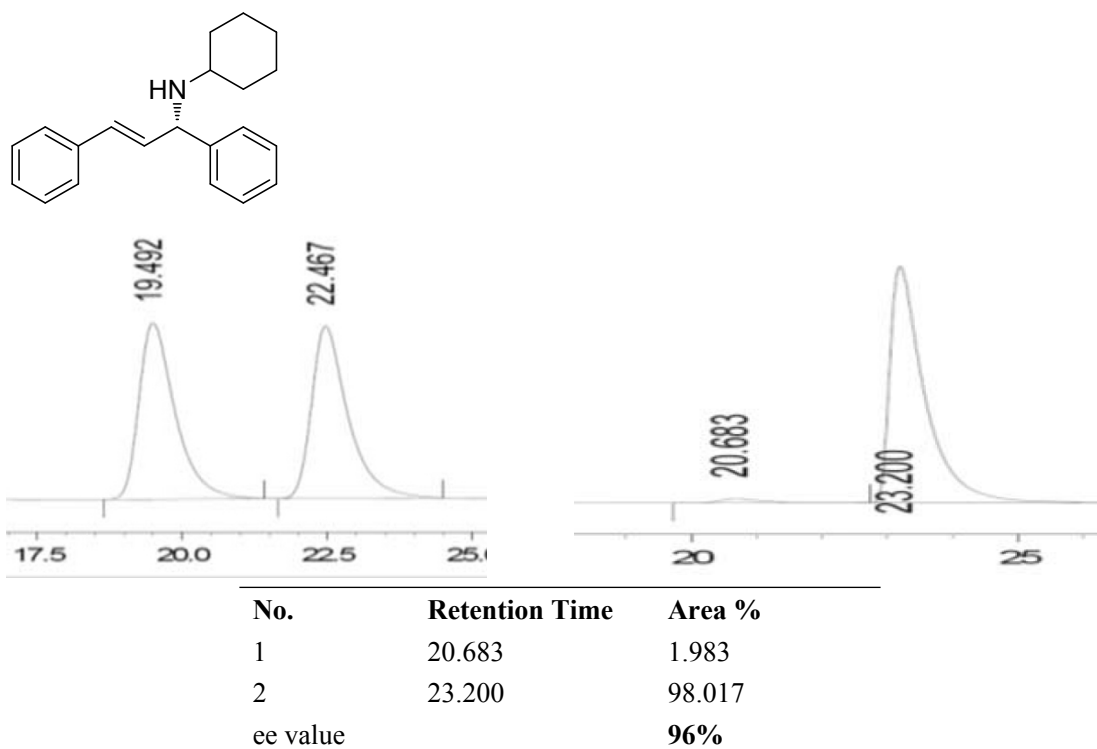

Figure 5. Enantioselective product of 1,3-diphenyl-2-propenyl acetate with cyclohexanamine using **3b** as chiral ligand in PhCH<sub>3</sub> at 25 °C (Table 3, entry 1).

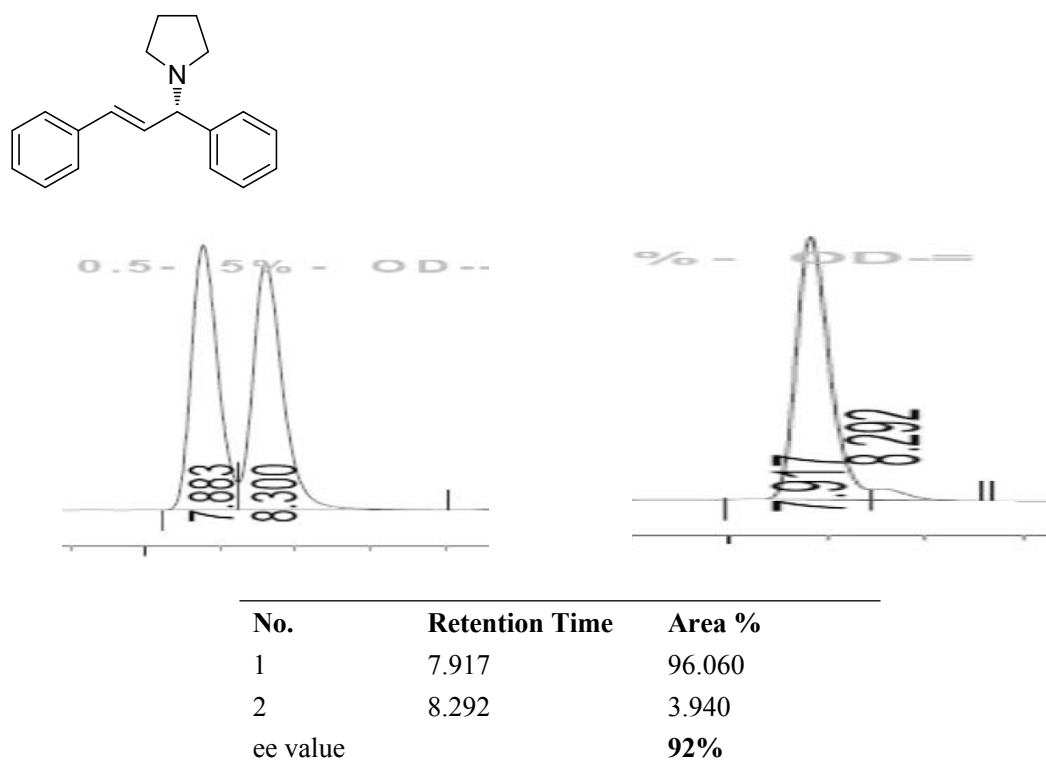

Figure 6. Enantioselective product of 1,3-diphenyl-2-propenyl acetate with pyrrolidine using **3b** as chiral ligand in PhCH<sub>3</sub> at 25 °C (Table 3, entry 3).

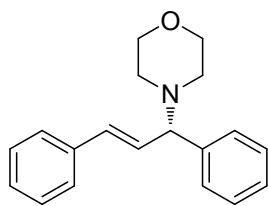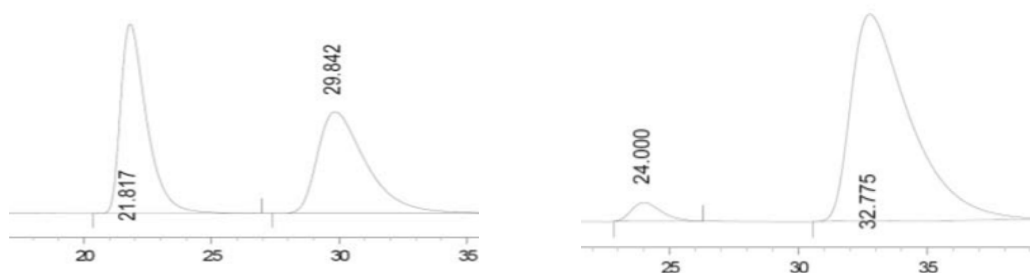

| No.      | Retention Time | Area %     |
|----------|----------------|------------|
| 1        | 24.000         | 4.390      |
| 2        | 32.775         | 95.610     |
| ee value |                | <b>91%</b> |

Figure 7. Enantioselective product of 1,3-diphenyl-2-propenyl acetate with morpholine using **3b** as chiral ligand in PhCH<sub>3</sub> at 25 °C (Table 3, entry 5).

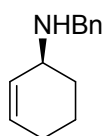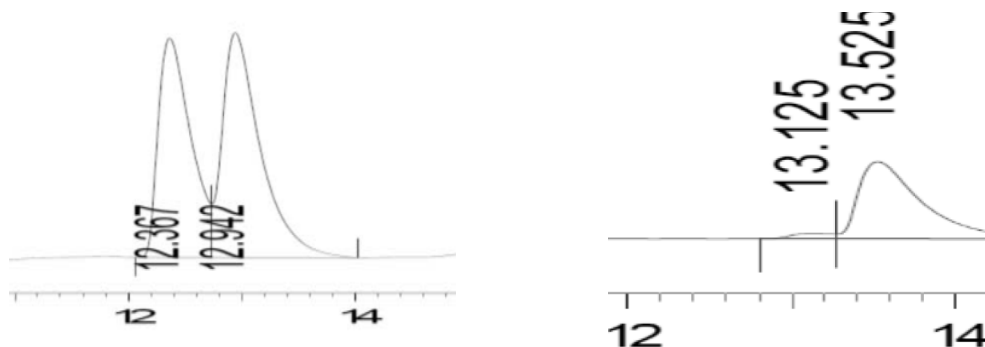

| No.      | Retention Time | Area %     |
|----------|----------------|------------|
| 1        | 13.125         | 4.068      |
| 2        | 13.525         | 95.932     |
| ee value |                | <b>92%</b> |

Figure 8. Enantioselective product of cyclohexen-1-yl acetate with benzylamine using **3b** as chiral ligand in PhCH<sub>3</sub> at 25 °C (Table 4, entry 1).

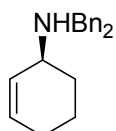

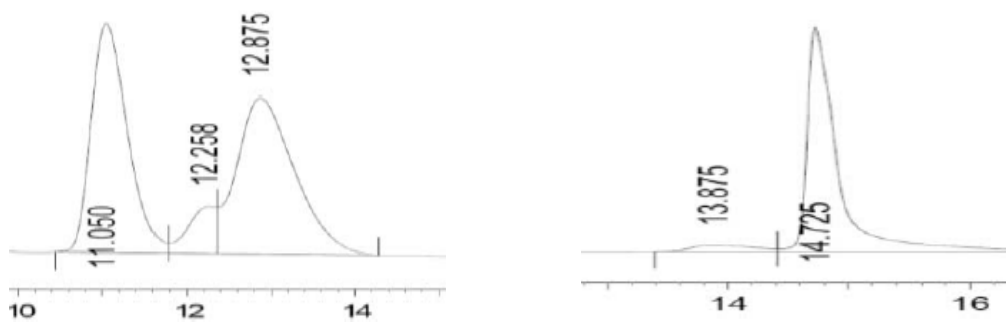

| No.      | Retention Time | Area %     |
|----------|----------------|------------|
| 1        | 13.875         | 5.189      |
| 2        | 14.725         | 94.811     |
| ee value |                | <b>90%</b> |

Figure 9. Enantioselective product of cyclohexen-1-yl acetate with dibenzylamine using **3b** as chiral ligand in PhCH<sub>3</sub> at 25 °C (Table 4, entry 3).
